# Supplementary material for: Effect of Canagliflozin on Total Cardiovascular Burden in Patients With Diabetes and Chronic Kidney Disease: A Post Hoc Analysis From the CREDENCE Trial
Source: PubMed Central journal article supplement — J Am Heart Assoc. 2022 Aug 5;11(16):e025045. doi: 10.1161/JAHA.121.025045 (PMC9496296; doi:10.1161/jaha.121.025045), 2022-08-05
Supplement: JAH3-11-e025045-s001.pdf [file JAH3-11-e025045-s001.pdf]

# **SUPPLEMENTAL MATERIAL**

**Table S1. CV composite outcome with and without collapsing events on the same day.**

|                                     | Canagliflozin (N=2202) |                 | Placebo (N=2199) |                 | IRR        |           |         |
|-------------------------------------|------------------------|-----------------|------------------|-----------------|------------|-----------|---------|
|                                     | Events (n)             | Events/1000 PYs | Events (n)       | Events/1000 PYs | Rate ratio | 95% CI    | p-value |
| CV composite outcome                |                        |                 |                  |                 |            |           |         |
| Total events collapsed <sup>§</sup> | 372                    | 71.4            | 511              | 100.6           | 0.71       | 0.59,0.86 | <0.001  |
| Total events Non-collapsed          | 396                    | 77.1            | 539              | 107.3           | 0.72       | 0.59,0.87 | 0.001   |

Total events include all first and recurrent events. Outcomes include fatal or non-fatal events. Total events estimates are based on the negative binomial model

<sup>§</sup>Events of CV events occurring 1 day or less apart were collapsed into a single event

PYs=patient years.

**Figure S1. Number of first and recurrent cardiovascular events by individual components of the cardiovascular composite endpoint.**

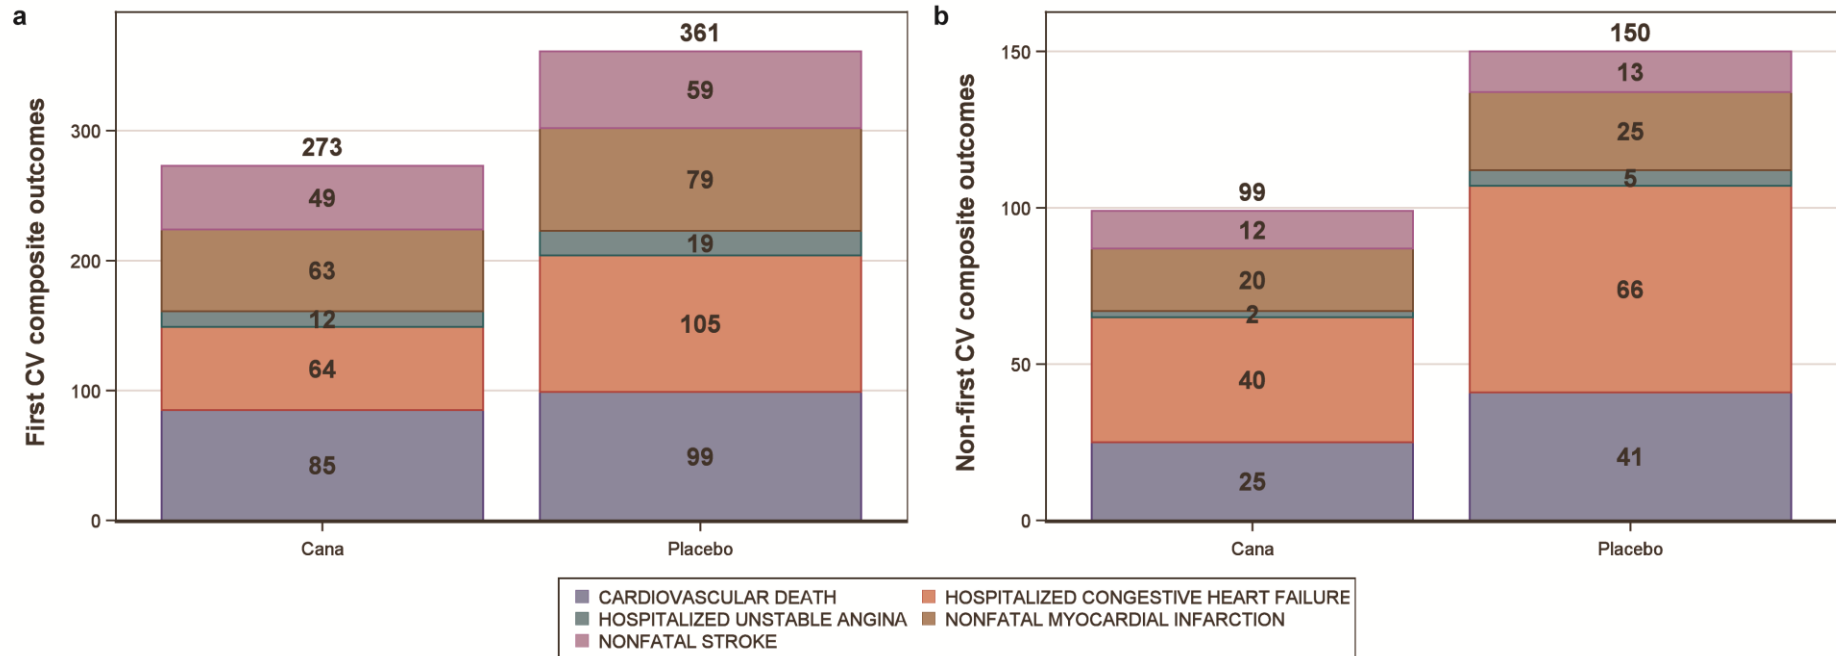

Panel A: CV: cardiovascular. Panel B: CV: cardiovascular.

**Figure S2. Total (First and Subsequent) events and Time to outcomes.**

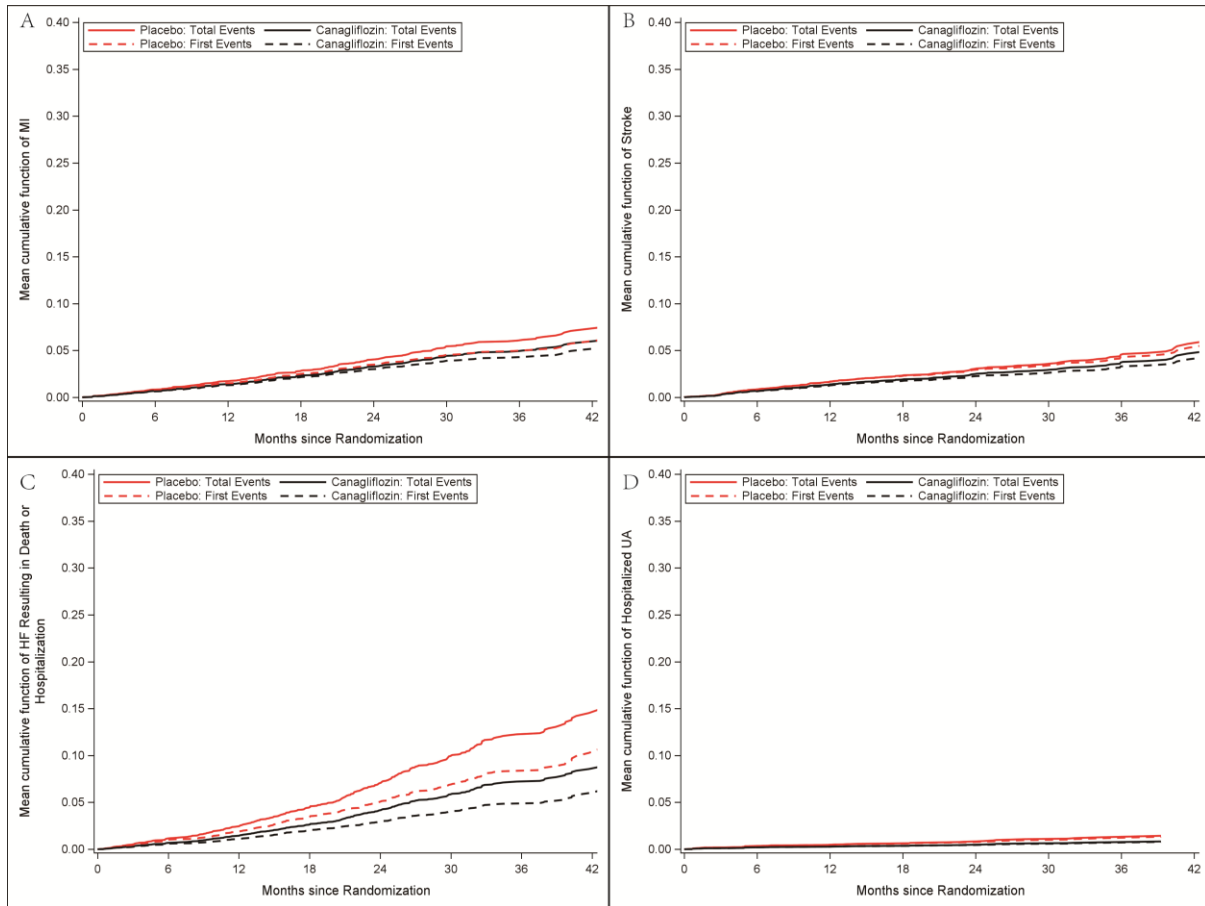

(A) MI; (B) Stroke (C) Heart Failure Resulting in Death or Hospitalization; (D) Hospitalized

UA

**Figure S3. Sensitivity analysis of total CV composite outcomes according to different models and first, second, and third events using WLW model, Anderson Grill model and on-treatment analysis.**

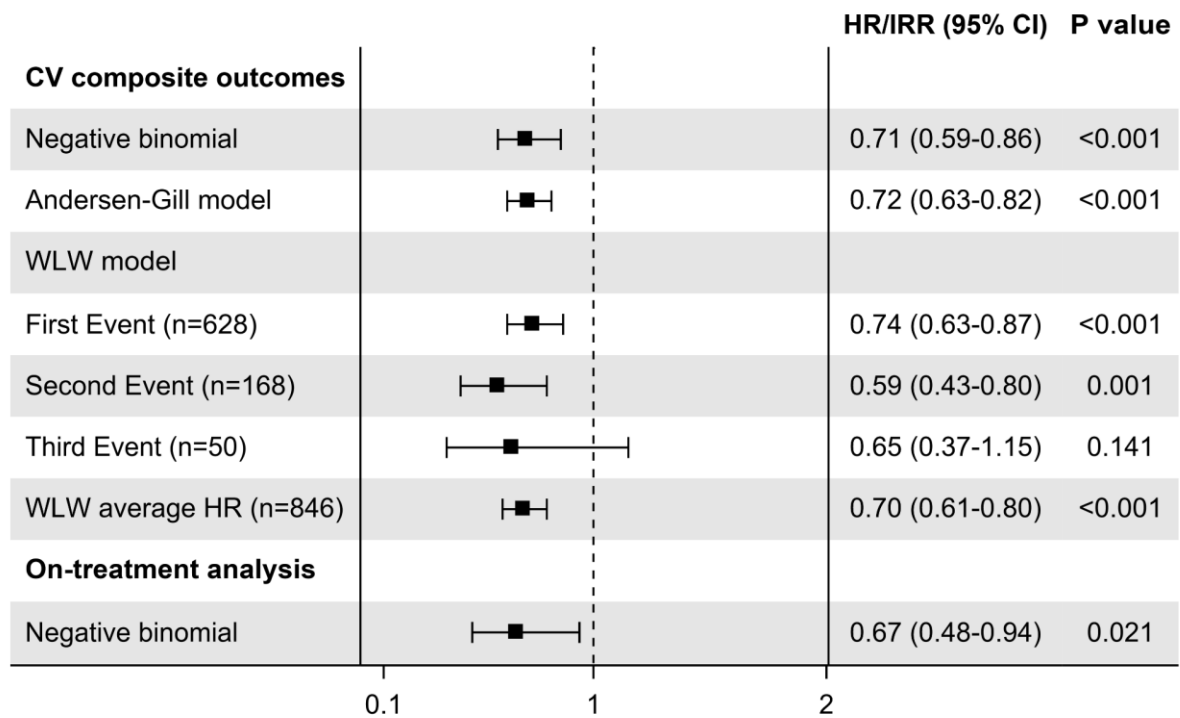

**Figure S4. Subgroup analysis by age, sex, CV history, baseline HbA1c and BMI of CV composite events.**

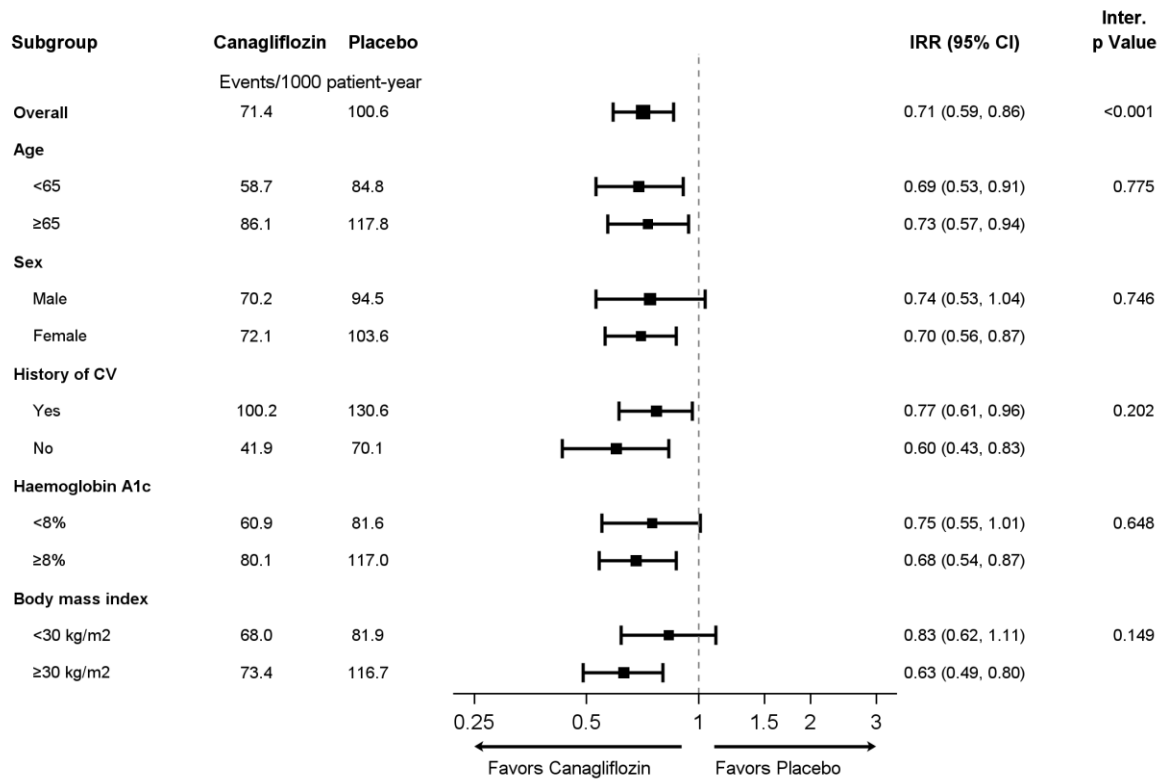

**Figure S5. Each outcome by baseline status.**

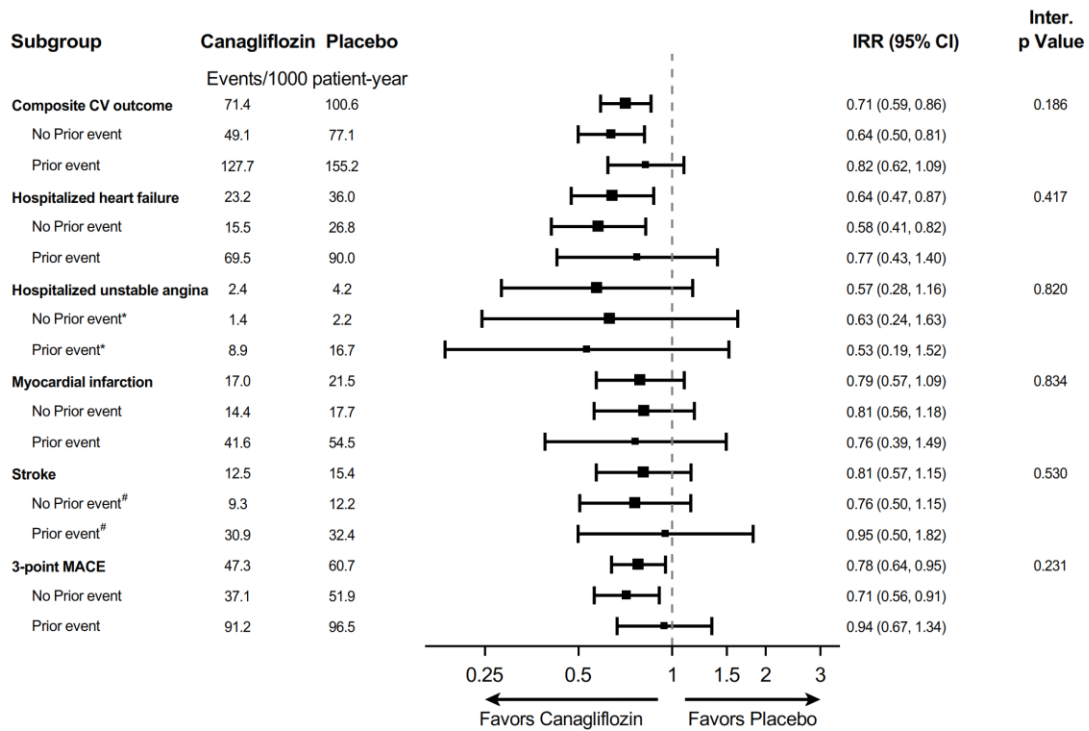

\*History of coronary artery disease at baseline.

# History of cerebrovascular disease at baseline.

Other prior events are the same events as the outcomes. For example, for HF outcomes are history of HF at baseline.
